# Supplementary material for: Reactive Organic Carbon Emissions from Volatile Chemical Products
Source: Copernicus journal article supplement (doi:10.5194/acp-2020-1111), 2020-11-09
Supplement: Supplementary file 1 [file acp-2020-1111-supplement.pdf]

## **Supporting Information:**

### **Reactive Organic Carbon Emissions from Volatile Chemical Products**

Karl M. Seltzer<sup>1</sup>, Elyse Pennington<sup>2,3</sup>, Venkatesh Rao<sup>4</sup>, Benjamin N. Murphy<sup>5</sup>, Madeleine Strum<sup>4</sup>, Kristin K. Isaacs<sup>5</sup>, Havala O.T. Pye<sup>5</sup>

5 <sup>1</sup>Oak Ridge Institute for Science and Education Postdoctoral Fellow in the Office of Research and Development, US Environmental Protection Agency, Research Triangle Park, NC 27711

<sup>2</sup>Oak Ridge Institute for Science and Education Fellow in the Office of Research and Development, US Environmental Protection Agency, Research Triangle Park, NC 27711

<sup>3</sup>California Institute of Technology, Pasadena, CA 91125

10 <sup>4</sup>Office of Air and Radiation, US Environmental Protection Agency, Research Triangle Park, NC 27711

<sup>5</sup>Office of Research and Development, US Environmental Protection Agency, Research Triangle Park, NC 27711

*Correspondence to:* Havala O.T. Pye (Pye.Havala@epa.gov)

15 **Table S1: PUCs, sub-PUCs, NAICS codes, and SCTG codes for all sub-PUCs.**

| Product Use Categories (PUCs) | Sub-Product Use Categories (sub-PUCs) | NAICS Codes <sup>a</sup>                                       | SCTG Code <sup>b</sup> | Producer Price Index Category <sup>c</sup>                                                                                        |
|-------------------------------|---------------------------------------|----------------------------------------------------------------|------------------------|-----------------------------------------------------------------------------------------------------------------------------------|
| Cleaning Products             | Detergents & Soaps                    | 3256111, 3256114, 3256117, 325611W                             | 233                    | Soap and Other Detergent Manufacturing                                                                                            |
|                               | General Cleaners                      | 3256125, 2356127, 2356121, 235611A, 2356130, 325612W           | 233                    | Polish and Other Sanitation Good Manufacturing;<br>Soap and Other Detergent Manufacturing;<br>Surface Active Agent Manufacturing; |
| Personal Care Products        | Daily Use Products                    | 3256204, 325620D, 325620G, 325620W, 3256207 (25%) <sup>d</sup> | 232                    | Toilet Preparation Manufacturing                                                                                                  |
|                               | Short Use Products                    | 3256201, 325620A, 325611D, 3256207 (75%) <sup>d</sup>          | 232                    | Toilet Preparation Manufacturing;<br>Soap and Other Detergent Manufacturing                                                       |
| Adhesives & Sealants          | Adhesives & Sealants                  | 3255201, 3255204, 3255207, 305520A, 325520W                    | 239                    | Adhesive Manufacturing                                                                                                            |
| Paints & Coatings             | Architectural Coatings                | 3255101, 325510W                                               | f                      | Paint and Coating Manufacturing                                                                                                   |
|                               | Aerosol Coatings                      | 3255107 (10%) <sup>e</sup>                                     | f                      | Paint and Coating Manufacturing                                                                                                   |
|                               | Allied Paint Products                 | 325510B                                                        | f                      | Paint and Coating Manufacturing                                                                                                   |
|                               | Industrial Coatings                   | 3255104, 3255107 (90%) <sup>e</sup>                            | f                      | Paint and Coating Manufacturing                                                                                                   |
| Printing Inks                 | Printing Inks                         | 3259101, 3259104, 3259107, 325910A, 325910E, 325910H, 325910W  | 231                    | Printing Ink Manufacturing                                                                                                        |
| Pesticides & FIFRA Products   | FIFRA Pesticides                      | 3253204, 3253207                                               | 235                    | Pesticide and Other Agricultural Chemical Manufacturing                                                                           |
|                               | Agricultural Pesticides               | 3251994, 3253201, 325320W                                      | 235                    | All Other Basic Organic Chemical Manufacturing; Pesticide and Other Agricultural Chemical Manufacturing                           |
| Dry Cleaning                  | Dry Cleaning                          | g                                                              |                        |                                                                                                                                   |
| Oil & Gas                     | Oil & Gas                             |                                                                |                        |                                                                                                                                   |
| Misc. Products                | Misc. Products                        | h                                                              |                        |                                                                                                                                   |
| Fuels & Lighter               | Fuels & Lighter                       |                                                                |                        |                                                                                                                                   |

<sup>a</sup>: NAICS Codes used for mapping U.S. Census Bureau (2016) ASM statistics to individual sub-PUCs.

<sup>b</sup>: SCTG Codes used for mapping U.S. Department of Transportation (2015) calculated commodity values to individual sub-PUCs. All values (\$) and mass (tons) quantities retrieved from Table 6.

20 <sup>c</sup>: Category used when retrieving Produce Price Indices from the U.S. Bureau of Labor Statistics, FRED, Federal Reserve Bank of St. Louis.

<sup>d</sup>: NAICS code 3256207 includes all hair preparation products. Based on sales data by California Air Resources Board 2015 Consumer and Commercial Products Survey Data, we estimate ~75% of all hair preparation products are short-use (e.g. shampoos, conditioners) and ~25% are daily-use (e.g. hair spray, other leave-in products).

25 <sup>e</sup>: NAICS code 3255107 includes all special-purpose coating materials (e.g. automotive finishing, traffic markings, aerosolized painting products). Based on shipment data from U.S. Census Bureau, Paint and Allied Products - 2010, MA325F(10), Issued July 2011, we estimate ~10% of all special-purpose coating materials in this NAICS are aerosolized painting products, with the residual consisting of special-purpose coating materials used exclusively in industrial settings.

<sup>f</sup>: All Paints & Coatings commodity values retrieved from: U.S. Census Bureau, Paint and Allied Products - 2010, MA325F(10), Issued July 2011.

30 <sup>g</sup>: sub-PUC usage estimated from solvent usage as reported by The Freedonia Group; Industry Study #3429; Solvents; July 2016.

<sup>h</sup>: sub-PUC usage estimated from reported sales data by California Air Resources Board 2015 Consumer and Commercial Products Survey Data: [https://ww3.arb.ca.gov/consprod/survey/2015\\_cp\\_survey\\_summary\\_data\\_2019-12-09.xlsx](https://ww3.arb.ca.gov/consprod/survey/2015_cp_survey_summary_data_2019-12-09.xlsx); last access: August 28, 2020

**Table S2: PUCs, sub-PUCs, NAICS codes, shipment values, commodity price, producer price index, and product usage for all sub-PUCs (2016). Per-capita product usage calculated using the U.S. Census Bureau's 2016 estimate of the U.S. population (~323,000,000).**

| PUCs (2016). Per-capita product usage calculated using the U.S. Census Bureau's 2016 estimate of the U.S. population (~323,606,000). |                                       |                            |                                           |                                       |                                        |                                        |                                            |       |
|--------------------------------------------------------------------------------------------------------------------------------------|---------------------------------------|----------------------------|-------------------------------------------|---------------------------------------|----------------------------------------|----------------------------------------|--------------------------------------------|-------|
| Product Use Categories (PUCs)                                                                                                        | Sub-Product Use Categories (sub-PUCs) | NAICS Codes                | ASM Shipment Values [\$1000] <sup>a</sup> | Commodity Price [\$ /kg] <sup>b</sup> | 2016 Producer Price Index <sup>c</sup> | 2012 Producer Price Index <sup>c</sup> | Annual Usage [kg/person/year] <sup>d</sup> |       |
| Cleaning Products                                                                                                                    | Detergents & Soaps                    | 3256111                    | 7849011                                   | 1.615                                 | 1.08                                   | 1.07                                   | 14.92                                      | 40.58 |
|                                                                                                                                      |                                       | 3256114                    | 10137793                                  |                                       | 1.08                                   | 1.07                                   | 19.27                                      |       |
|                                                                                                                                      |                                       | 3256117                    | 2740950                                   |                                       | 1.08                                   | 1.07                                   | 5.21                                       |       |
|                                                                                                                                      |                                       | 325611W                    | 625339                                    |                                       | 1.08                                   | 1.07                                   | 1.19                                       |       |
|                                                                                                                                      | General Cleaners                      | 3256125                    | 5391225                                   | 1.615                                 | 1.11                                   | 1.05                                   | 9.85                                       | 28.47 |
|                                                                                                                                      |                                       | 2356127                    | 1024203                                   |                                       | 1.11                                   | 1.05                                   | 1.87                                       |       |
|                                                                                                                                      |                                       | 2356121                    | 1067746                                   |                                       | 1.11                                   | 1.05                                   | 1.95                                       |       |
|                                                                                                                                      |                                       | 235611A                    | 290791                                    |                                       | 1.08                                   | 1.07                                   | 0.55                                       |       |
|                                                                                                                                      |                                       | 2356130                    | 7173431                                   |                                       | 1.18                                   | 1.16                                   | 13.48                                      |       |
| 325612W                                                                                                                              | 417549                                | 1.11                       | 1.05                                      | 0.76                                  |                                        |                                        |                                            |       |
| Personal Care Products                                                                                                               | Daily Use Products                    | 3256204                    | 3140488                                   | 9.290                                 | 1.07                                   | 1.03                                   | 1.01                                       | 8.83  |
|                                                                                                                                      |                                       | 325620D                    | 7912985                                   |                                       | 1.07                                   | 1.03                                   | 2.54                                       |       |
|                                                                                                                                      |                                       | 325620G                    | 13192677                                  |                                       | 1.07                                   | 1.03                                   | 4.23                                       |       |
|                                                                                                                                      |                                       | 325620W                    | 1562269                                   |                                       | 1.07                                   | 1.03                                   | 0.50                                       |       |
|                                                                                                                                      |                                       | 3256207 (25%) <sup>e</sup> | 1734011                                   |                                       | 1.07                                   | 1.03                                   | 0.56                                       |       |
|                                                                                                                                      | Short Use Products                    | 3256201                    | 281282                                    | 9.290                                 | 1.07                                   | 1.03                                   | 0.09                                       | 3.16  |
|                                                                                                                                      |                                       | 325620A                    | 3574170                                   |                                       | 1.07                                   | 1.03                                   | 1.15                                       |       |
|                                                                                                                                      |                                       | 325611D                    | 789937                                    |                                       | 1.08                                   | 1.07                                   | 0.26                                       |       |
|                                                                                                                                      |                                       | 3256207 (75%) <sup>e</sup> | 5202032                                   |                                       | 1.07                                   | 1.03                                   | 1.67                                       |       |
| Adhesives & Sealants                                                                                                                 | Adhesives & Sealants                  | 3255201                    | 1405299                                   | 2.602                                 | 1.11                                   | 1.10                                   | 1.65                                       | 15.23 |
|                                                                                                                                      |                                       | 3255204                    | 7967659                                   |                                       | 1.11                                   | 1.10                                   | 9.34                                       |       |
|                                                                                                                                      |                                       | 3255207                    | 694706                                    |                                       | 1.11                                   | 1.10                                   | 0.81                                       |       |
|                                                                                                                                      |                                       | 305520A                    | 2405554                                   |                                       | 1.11                                   | 1.10                                   | 2.82                                       |       |
|                                                                                                                                      |                                       | 325520W                    | 513470                                    |                                       | 1.11                                   | 1.10                                   | 0.60                                       |       |
| Paints & Coatings                                                                                                                    | Architectural Coatings                | 3255101,                   | 11253306                                  | 2.694 <sup>g</sup>                    | 1.14                                   | 1.00 <sup>h</sup>                      | 11.32                                      | 13.27 |
|                                                                                                                                      |                                       | 325510W                    | 1933890                                   |                                       | 1.14                                   | 1.00 <sup>h</sup>                      | 1.95                                       |       |
|                                                                                                                                      | Aerosol Coatings                      | 3255107 (10%) <sup>f</sup> | 671641                                    | 4.616 <sup>g</sup>                    | 1.14                                   | 1.00 <sup>h</sup>                      | 0.39                                       | 0.39  |
|                                                                                                                                      | Allied Paint Products                 | 325510B                    | 1383897                                   | 2.987 <sup>g</sup>                    | 1.14                                   | 1.00 <sup>h</sup>                      | 1.26                                       | 1.26  |
|                                                                                                                                      | Industrial Coatings                   | 3255104                    | 6157635                                   | 4.310 <sup>g</sup>                    | 1.14                                   | 1.00 <sup>h</sup>                      | 3.87                                       | 7.42  |
|                                                                                                                                      |                                       | 3255107 (90%) <sup>f</sup> | 6044765                                   | 4.616 <sup>g</sup>                    | 1.14                                   | 1.00 <sup>h</sup>                      | 3.55                                       |       |
| Printing Inks                                                                                                                        | Printing Inks                         | 3259101                    | 265917                                    | 4.217                                 | 1.17                                   | 1.07                                   | 0.18                                       | 3.20  |
|                                                                                                                                      |                                       | 3259104                    | 1050099                                   |                                       | 1.17                                   | 1.07                                   | 0.71                                       |       |
|                                                                                                                                      |                                       | 3259107                    | 271753                                    |                                       | 1.17                                   | 1.07                                   | 0.18                                       |       |
|                                                                                                                                      |                                       | 325910A                    | 837641                                    |                                       | 1.17                                   | 1.07                                   | 0.56                                       |       |
|                                                                                                                                      |                                       | 325910E                    | 1233022                                   |                                       | 1.17                                   | 1.07                                   | 0.83                                       |       |
|                                                                                                                                      |                                       | 325910H                    | 608350                                    |                                       | 1.17                                   | 1.07                                   | 0.41                                       |       |
|                                                                                                                                      |                                       | 325910W                    | 498817                                    |                                       | 1.17                                   | 1.07                                   | 0.34                                       |       |
| Pesticides & FIFRA Products                                                                                                          | FIFRA Pesticides                      | 3253204                    | 905062                                    | 4.552                                 | 1.05                                   | 1.04                                   | 0.61                                       | 1.46  |
|                                                                                                                                      |                                       | 3253207                    | 1273582                                   |                                       | 1.05                                   | 1.04                                   | 0.86                                       |       |
|                                                                                                                                      | Agricultural Pesticides               | 3251994                    | 1475958                                   | 4.552                                 | 1.04                                   | 1.12                                   | 1.08                                       | 10.32 |
|                                                                                                                                      |                                       | 3253201                    | 12842492                                  |                                       | 1.05                                   | 1.04                                   | 8.63                                       |       |
|                                                                                                                                      |                                       | 325320W                    | 911325                                    |                                       | 1.05                                   | 1.04                                   | 0.61                                       |       |
| Dry Cleaning                                                                                                                         | Dry Cleaning                          | i                          |                                           |                                       |                                        |                                        |                                            | 0.03  |
| Oil & Gas                                                                                                                            | Oil & Gas                             |                            |                                           |                                       |                                        |                                        |                                            | 1.32  |
| Misc. Products                                                                                                                       | Misc. Products                        |                            |                                           |                                       |                                        |                                        |                                            | 0.18  |
| Fuels & Lighter                                                                                                                      | Fuels & Lighter                       | j                          |                                           |                                       |                                        |                                        |                                            | 2.80  |

<sup>a</sup>: All values (\$) retrieved via the U.S. Census Bureau ASM's API tool.

<sup>b</sup>: All quantities retrieved from Table 6 of U.S. Department of Transportation (2015) and representative of 2012 values.

<sup>c</sup>: U.S. Bureau of Labor Statistics, Producer Price Index by Industry, retrieved from FRED, Federal Reserve Bank of St. Louis. All re-indexed to 2010.

<sup>d</sup>: Annual usage [kg/person/year] = (ASM Shipment Values) ÷ (Commodity Price × (2016 Index / 2012 Index)) ÷ (Population)

<sup>e</sup>: NAICS code 3256207 includes all hair preparation products. Based on sales data by California Air Resources Board 2015 Consumer and Commercial Products Survey Data, we estimate ~75% of all hair preparation products are short-use (e.g. shampoos, conditioners) and ~25% are daily-use (e.g. hair spray, other leave-in products).

45 <sup>f</sup>: NAICS code 3255107 includes all special-purpose coating materials (e.g. automotive finishing, traffic markings, aerosolized painting products). Based on shipment data from U.S. Census Bureau, Paint and Allied Products - 2010, MA325F(10), Issued July 2011, we estimate ~10% of all special-purpose coating materials in this NAICS are aerosolized painting products, with the residual consisting of special-purpose coating materials used exclusively in industrial settings.

<sup>g</sup>: Commodity values retrieved from: U.S. Census Bureau, Paint and Allied Products - 2010, MA325F(10), Issued July 2011.

<sup>h</sup>: To be consistent with U.S. Census Bureau, Paint and Allied Products – 2010, producer price indices from 2010 used here.

50 <sup>i</sup>: sub-PUC usage estimated from solvent usage as reported by The Freedonia Group; Industry Study #3429; Solvents; July 2016.

<sup>j</sup>: sub-PUC usage estimated from reported sales data by California Air Resources Board 2015 Consumer and Commercial Products Survey Data (CARB, 2019).

**Table S3: Derivation of complete (1<sup>st</sup>-order and organic) product composition profiles for Adhesives & Sealants.**

| Product Type                                         | CARB Profile <sup>a</sup> | Sales [tpd]  | Sales [%] | Water [%]     | Inorganic [%] | Organic [%]   | Evaporative Organics [%] <sup>b</sup> | Evaporative Organics Profile Composite [%] <sup>c</sup> |
|------------------------------------------------------|---------------------------|--------------|-----------|---------------|---------------|---------------|---------------------------------------|---------------------------------------------------------|
| Other adhesives                                      | 3096                      | 58.95        | 38.6%     | 3.97%         | 61.47%        | 34.56%        | 1.09%                                 | 16.81%                                                  |
| Sealant or Caulking Compound -- Nonchemically Curing | 3005                      | 30.34        | 19.9%     | 18.44%        | 51.43%        | 30.14%        | 2.14%                                 | 16.99%                                                  |
| Spackling Compound                                   | 3005                      | 12.43        | 8.1%      | 19.58%        | 51.06%        | 29.36%        | 1.56%                                 | 5.07%                                                   |
| Carpet and Tile Adhesive                             | 3003                      | 11.69        | 7.7%      | 17.45%        | 52.61%        | 29.93%        | 1.29%                                 | 3.95%                                                   |
| Construction, Panel, or Floor Covering Adhesive      | 3001                      | 8.81         | 5.8%      | 26.41%        | 44.08%        | 29.51%        | 5.52%                                 | 12.73%                                                  |
| Sealant or Caulking Compound -- Chemically Curing    | 3005                      | 7.31         | 4.8%      | 1.05%         | 60.67%        | 38.28%        | 5.25%                                 | 10.04%                                                  |
| Other sealants and caulks                            | 3005                      | 6.85         | 4.5%      | 8.57%         | 55.92%        | 35.51%        | 5.07%                                 | 9.10%                                                   |
| Woodworking Glue                                     | 1510                      | 6.00         | 3.9%      | 47.26%        | 33.39%        | 19.35%        | 1.17%                                 | 1.84%                                                   |
| General Purpose Adhesive                             | 3002                      | 4.40         | 2.9%      | 28.14%        | 41.66%        | 30.20%        | 7.52%                                 | 8.67%                                                   |
| Insulating and Sealing Spray Foam                    | 3084                      | 2.48         | 1.6%      | 0.10%         | 55.03%        | 44.87%        | 14.91%                                | 9.69%                                                   |
| Wood Filler                                          | 1521                      | 1.27         | 0.8%      | 12.63%        | 54.66%        | 32.70%        | 2.95%                                 | 0.98%                                                   |
| Arts and Crafts Adhesive                             | 3105                      | 0.66         | 0.4%      | 68.53%        | 18.91%        | 12.55%        | 2.26%                                 | 0.39%                                                   |
| Contact Adhesive - General Purpose                   | 3002                      | 0.50         | 0.3%      | 42.69%        | 34.97%        | 22.34%        | 3.30%                                 | 0.43%                                                   |
| Floor Seam Sealer                                    | 3001                      | 0.24         | 0.2%      | 47.11%        | 30.29%        | 22.60%        | 6.11%                                 | 0.39%                                                   |
| Specialty Automotive Adhesive                        | 1503                      | 0.24         | 0.2%      | 0.13%         | 54.13%        | 45.75%        | 16.28%                                | 1.02%                                                   |
| Pipe Thread Sealant/Pipe Joint Compound              | 3004                      | 0.14         | 0.1%      | 0.00%         | 61.25%        | 38.74%        | 5.40%                                 | 0.20%                                                   |
| Contact Adhesive - Special Purpose                   | 2513                      | 0.08         | 0.1%      | 1.04%         | 22.16%        | 76.80%        | 64.73%                                | 1.37%                                                   |
| Thread Locking Compound*                             | 3002                      | 0.06         | 0.0%      | 0.18%         | 58.07%        | 41.75%        | 10.14%                                | 0.16%                                                   |
| Tile and Grout Sealer                                | 3097                      | 0.06         | 0.0%      | 70.33%        | 18.07%        | 11.61%        | 1.77%                                 | 0.03%                                                   |
| Household Glues and Paste                            | 3002                      | 0.05         | 0.0%      | 53.23%        | 24.11%        | 22.66%        | 9.54%                                 | 0.14%                                                   |
| <b>Adhesives &amp; Sealants<sup>d</sup></b>          | <b>--</b>                 | <b>152.6</b> | <b>--</b> | <b>12.80%</b> | <b>53.22%</b> | <b>33.99%</b> | <b>5.02%</b>                          | <b>--</b>                                               |

<sup>a</sup>: Assigned organic profile for each product type. Retrieved from California Air Resources Board and available:

55 <https://ww2.arb.ca.gov/speciation-profiles-used-carb-modeling>; last access: August 28, 2020

<sup>b</sup>: “Evaporative Organics” is a component of “Organic.” This represents the potentially evaporative organic fraction and excludes “non-evaporative” (i.e. non-volatile) organics, which are not included in the California Air Resource Board’s organic profiles.

<sup>c</sup>: Percent of “Evaporative Organic,” weighted by sales abundance:

*Evaporative Organic Profile Composite* [%]

60 
$$= (Sales)_i \times (Evaporative\ Organic)_i \div \left( \sum_{i=1}^n (Sales)_i \times (Evaporative\ Organics)_i \right)$$

Where i is the Product Type index and n = 20 (i.e. all Product Types).

<sup>d</sup>: All water, inorganic, organic, and evaporative organics percentages for the complete sub-PUC are derived on a weighted basis from the reported sales abundance.

**Table S4: Organic composition profile source/method summary for all sub-PUCs.**

| Product Use Categories (PUCs) | Sub-Product Use Categories (sub-PUCs) | Organic Composition Source/Methods                                                                                                |
|-------------------------------|---------------------------------------|-----------------------------------------------------------------------------------------------------------------------------------|
| Cleaning Products             | Detergents & Soaps                    | Composite derived from CARB's 2015 Consumer and Commercial Products Survey <sup>b</sup>                                           |
|                               | General Cleaners                      |                                                                                                                                   |
| Personal Care Products        | Daily Use Products                    |                                                                                                                                   |
|                               | Short Use Products                    |                                                                                                                                   |
| Adhesives & Sealants          | Adhesives & Sealants                  |                                                                                                                                   |
| Paints & Coatings             | Architectural Coatings                | Composite derived from CARB's 2005 Architectural Coatings Survey <sup>c</sup> ; Assumes 88% is water-based, 12% is solvent-based. |
|                               | Aerosol Coatings                      | Composite derived from CARB's 2010 Aerosol Coatings Survey <sup>d</sup>                                                           |
|                               | Allied Paint Products                 | Composite derived from CARB's 2015 Consumer and Commercial Products Survey                                                        |
|                               | Industrial Coatings                   | SPECIATEv5.0 <sup>e</sup> Profile: 3149                                                                                           |
| Printing Inks                 | Printing Inks                         | SPECIATEv5.0 Profile: 2570                                                                                                        |
| Pesticides & FIFRA Products   | FIFRA Pesticides                      | Composite derived from CARB's 2015 Consumer and Commercial Products Survey                                                        |
|                               | Agricultural Pesticides               |                                                                                                                                   |
| Dry Cleaning                  | Dry Cleaning                          | SPECIATEv5.0 Profile: 2422                                                                                                        |
| Oil & Gas                     | Oil & Gas                             | <sup>a</sup>                                                                                                                      |
| Misc. Products                | Misc. Products                        | Composite derived from CARB's 2015 Consumer and Commercial Products Survey                                                        |
| Fuels & Lighter               | Fuels & Lighter                       |                                                                                                                                   |

65 <sup>a</sup>: According to The Freedonia Group; Industry Study #3429; Solvents; July 2016: ~65% of all solvents used in O&G operations are alcohols, with the residual largely consisting of "hydrocarbons." We allocate all alcohols to methanol, as it is widely used in and emitted from O&G operations (Stringfellow, et al., 2017; Lyman et al., 2018; Mansfield et al., 2018). We treat the remaining 35% as naphtha, a blend of hydrocarbon solvents.

<sup>b</sup>: Ref: CARB, 2019

70 <sup>c</sup>: Ref: CARB, 2007

<sup>d</sup>: Ref: CARB, 2012

<sup>e</sup>: Ref: EPA, 2019b

**Table S5: Assigned use timescales for all sub-PUCs.**

| <b>Product Use Categories (PUCs)</b> | <b>Sub-Product Use Categories (sub-PUCs)</b> | <b>Use Timescale</b> |
|--------------------------------------|----------------------------------------------|----------------------|
| Cleaning Products                    | Detergents & Soaps                           | Minutes              |
|                                      | General Cleaners                             | Days                 |
| Personal Care Products               | Daily Use Products                           | Days                 |
|                                      | Short Use Products                           | Minutes              |
| Adhesives & Sealants                 | Adhesives & Sealants                         | Years                |
| Paints & Coatings                    | Architectural Coatings                       | Years                |
|                                      | Aerosol Coatings                             | Years                |
|                                      | Allied Paint Products                        | Years                |
|                                      | Industrial Coatings                          | Years                |
| Printing Inks                        | Printing Inks                                | Years                |
| Pesticides & FIFRA Products          | FIFRA Pesticides                             | Weeks                |
|                                      | Agricultural Pesticides                      | Weeks                |
| Dry Cleaning                         | Dry Cleaning                                 | Minutes              |
| Oil & Gas                            | Oil & Gas                                    | Years                |
| Misc. Products                       | Misc. Products                               | Years                |
| Fuels & Lighter                      | Fuels & Lighter                              | Years                |

75 **Table S6: Methods and Data Sources for Allocating National Emissions to County-level.**

| Sub-Product Use Categories (sub-PUCs) | Allocation Proxy | Employment NAICS <sup>a</sup> | NAICS Description                                            |
|---------------------------------------|------------------|-------------------------------|--------------------------------------------------------------|
| Detergents & Soaps                    | Population       | --                            | --                                                           |
| General Cleaners                      | Population       | --                            | --                                                           |
| Daily Use Products                    | Population       | --                            | --                                                           |
| Short Use Products                    | Population       | --                            | --                                                           |
| Adhesives & Sealants                  | Population       | --                            | --                                                           |
| Architectural Coatings                | Population       | --                            | --                                                           |
| Aerosol Coatings                      | Population       | --                            | --                                                           |
| Allied Paint Products                 | Employment       | 236///                        | Construction of Buildings                                    |
| Industrial Coatings                   | Employment       | 811121                        | Automotive Body, Paint, and Interior Repair and Maintenance  |
|                                       |                  | 4411//                        | Automobile Dealers                                           |
|                                       |                  | 4412//                        | Other Motor Vehicle Dealers                                  |
|                                       |                  | 336411                        | Aircraft Manufacturing                                       |
|                                       |                  | 3365//                        | Railroad Rolling Stock Manufacturing                         |
|                                       |                  | 3366//                        | Ship and Boat Building                                       |
|                                       |                  | 488390                        | Other Support Activities for Water Transportation            |
|                                       |                  | 339///                        | Miscellaneous Manufacturing                                  |
|                                       |                  | 3369//                        | Other Transportation Equipment Manufacturing                 |
|                                       |                  | 811///                        | Repair and Maintenance                                       |
|                                       |                  | 3133//                        | Textile and Fabric Finishing and Fabric Coating Mills        |
|                                       |                  | 332812                        | Metal Coating, Engraving                                     |
|                                       |                  | 2373//                        | Highway, Street, and Bridge Construction                     |
|                                       |                  | 321///                        | Wood Product Manufacturing                                   |
|                                       |                  | 337110                        | Wood Kitchen Cabinet and Countertop Manufacturing            |
|                                       |                  | 337121                        | Upholstered Household Furniture Manufacturing                |
|                                       |                  | 337122                        | Non-upholstered Wood Household Furniture Manufacturing       |
|                                       |                  | 337211                        | Wood Office Furniture Manufacturing                          |
|                                       |                  | 337212                        | Custom Architectural Woodwork and Millwork Manufacturing     |
|                                       |                  | 337124                        | Metal Household Furniture Manufacturing                      |
|                                       |                  | 337214                        | Office Furniture (except Wood) Manufacturing                 |
|                                       |                  | 337215                        | Showcase, Partition, Shelving, and Locker Manufacturing      |
|                                       |                  | 322///                        | Paper Manufacturing                                          |
|                                       |                  | 325992                        | Photographic Film, Paper, Plate, and Chemical Manufacturing  |
|                                       |                  | 33243/                        | Metal Can, Box, and Other Metal Container Manufacturing      |
|                                       |                  | 333///                        | Machinery Manufacturing                                      |
|                                       |                  | 3352//                        | Household Appliance Manufacturing                            |
|                                       |                  | 331318                        | Other Aluminum Rolling, Drawing, and Extruding               |
|                                       |                  | 3314//                        | Nonferrous Metal (except Aluminum) Production and Processing |
|                                       |                  | 33592/                        | Communication and Energy Wire and Cable Manufacturing        |
|                                       |                  | 335311                        | Power, Distribution, and Specialty Transformer Manufacturing |
|                                       |                  | 3361//                        | Motor Vehicle Manufacturing                                  |
|                                       |                  | 3362//                        | Motor Vehicle Body and Trailer Manufacturing                 |
|                                       |                  | 3363//                        | Motor Vehicle Parts Manufacturing                            |
| Printing Inks                         | Employment       | 32311/                        | Printing                                                     |
|                                       |                  | 3222//                        | Converted Paper Product Manufacturing                        |
| FIFRA Pesticides                      | Population       | --                            | --                                                           |
| Agricultural Pesticides               | Pesticide Use    | b                             |                                                              |
| Dry Cleaning                          | Employment       | 812320                        | Dry Cleaning and Laundry Services                            |
| Oil & Gas                             | O&G Well Count   | c                             |                                                              |
| Misc. Products                        | Population       | --                            | --                                                           |
| Fuels & Lighter                       | Population       | --                            | --                                                           |

<sup>a</sup>: All employment mapping, except Allied Paint Products, follows the NAICS mapping from the 2017 NEI (U.S. EPA, 2017). For Allied Paint Products, mapping is allocated based on construction employment.

<sup>b</sup>: Allocation of Agriculture Pesticides emissions follows the mapping from the 2017 NEI (U.S. Geological Survey, Pesticide National Synthesis Project, <https://water.usgs.gov/nawqa/pnsp/usage/maps/county-level/>; last access: August 31, 2020).

<sup>c</sup>: U.S. Energy Information Administration, The Distribution of U.S. Oil and Natural Gas Wells by Production Rate, Washington, DC, 2019.

80



**Table S7: Observed emission ratios (de Gouw et al., 2017; de Gouw et al., 2018) and inventory emission ratios for Los Angeles County. VCPy: All emissions retrieved from the 2017 NEI, except VCPs, which are replaced using the emissions derived in this study (representative of 2016). 2017 NEI: All emissions retrieved from the 2017 NEI. Emissions consist of all on-road, non-road, non-point, and point sources, as well as biogenic ethanol, methanol, and acetone. Total CO emissions (~320 Gg) include all on-road, non-road, non-point, and point sources.**

| Compound             | Observed<br>[g /g CO] | VCPy<br>[g /g CO] | 2017 NEI<br>[g /g CO] |
|----------------------|-----------------------|-------------------|-----------------------|
| Ethanol              | 0.0752                | 0.0555            | 0.0301                |
| Acetone              | 0.0241                | 0.0264            | 0.0116                |
| i-Propanol           | 0.0212                | 0.0131            | 0.0070                |
| Toluene              | 0.0112                | 0.0227            | 0.0169                |
| Propane              | 0.0211                | 0.0115            | 0.0074                |
| i-Butane             | 0.0066                | 0.0076            | 0.0060                |
| (m + p)-Xylenes      | 0.0078                | 0.0091            | 0.0041                |
| n-Butane             | 0.0103                | 0.0141            | 0.0116                |
| Methyl Ethyl Ketone  | 0.0023                | 0.0044            | 0.0017                |
| Methanol             | 0.0243                | 0.0188            | 0.0172                |
| Undecane             | 0.0018                | 0.0031            | 0.0012                |
| Octanes              | 0.0072                | 0.0031            | 0.0014                |
| Heptane              | 0.0030                | 0.0031            | 0.0021                |
| Nonane               | 0.0015                | 0.0018            | 0.0006                |
| Hexane               | 0.0043                | 0.0051            | 0.0039                |
| Methylcyclohexane    | 0.0015                | 0.0020            | 0.0007                |
| Trimethylbenzenes    | 0.0063                | 0.0035            | 0.0022                |
| Ethyltoluenes        | 0.0024                | 0.0030            | 0.0020                |
| Decane               | 0.0015                | 0.0012            | 0.0004                |
| Ethylbenzene         | 0.0023                | 0.0026            | 0.0019                |
| n-Pentane            | 0.0088                | 0.0046            | 0.0043                |
| Dimethylcyclohexanes | 0.0008                | 0.0004            | 0.0001                |
| Styrene              | 0.0013                | 0.0013            | 0.0013                |
| Propylbenzenes       | 0.0006                | 0.0007            | 0.0004                |
| o-Xylene             | 0.0029                | 0.0019            | 0.0018                |
| Methylacetate        | 0.0006                | 0.0003            | 0.0001                |
| 2-Methylhexane       | 0.0021                | 0.0012            | 0.0011                |
| n-Propanol           | 0.0007                | 0.0002            | 0.0001                |
| 3-Methylpentane      | 0.0043                | 0.0022            | 0.0022                |
| Cyclohexane          | 0.0016                | 0.0018            | 0.0017                |

**Table S8: SCC – SPECIATEv5.0 (EPA, 2019b) profile mapping for all non-point sources in the 2017 NEI. A similar mapping scheme was used to additionally speciate 53 on-road SCCs, 57 non-road SCCs, and > 4,500 point SCCs.**

| SCC        | SPECIATE Profile |
|------------|------------------|------------|------------------|------------|------------------|------------|------------------|
| 2401001000 | 95513            | 2104006000 | 0195             | 2620030000 | 3002             | 2810005001 | 5560             |
| 2401005000 | 2402             | 2104007000 | 0195             | 2102004001 | 0002             | 2810035000 | 5560             |
| 2401008000 | 3135             | 2302002100 | 4553             | 2102004002 | 0002             | 2104002000 | 1185             |
| 2401090000 | 3149             | 2302002200 | 4553             | 2102007000 | 0003             | 2601020000 | 0122             |
| 2401100000 | 3138             | 2302003000 | 4652             | 2304000000 | 1089             | 2103002000 | 1178             |
| 2401200000 | 3138             | 2302003100 | 4651             | 2308000000 | 1008             | 2810005000 | 5560             |
| 2420000000 | 2422             | 2302003200 | 4651             | 2309000000 | 2466             | 2830000000 | 0000             |
| 2425000000 | 1191             | 2501011011 | 8870             | 2312000000 | 0000             | 2505020180 | 2488             |
| 2460100000 | 95509            | 2501011012 | 8870             | 2399000000 | 0000             | 2302070000 | 1188             |
| 2460200000 | 95508            | 2501011013 | 8870             | 2510000000 | 0000             | 2862000000 | 0000             |
| 2460400000 | 95510            | 2501011014 | 8870             | 2620000000 | 3002             | 2301000000 | 2462             |
| 2460500000 | 95512            | 2501011015 | 8870             | 2650000000 | 3002             | 2301030000 | 2462             |
| 2460600000 | 95507            | 2501012011 | 8870             | 2660000000 | 8870             | 2635000000 | 8870             |
| 2460800000 | 95511            | 2501012012 | 8870             | 2810030000 | 0000             | 2840000000 | 2402             |
| 2460900000 | 95512            | 2501012013 | 8870             | 2810040000 | 5565             | 2851001000 | 0000             |
| 2461021000 | 1007             | 2501012014 | 8870             | 2810050000 | 0000             | 2501070053 | DIESEVP          |
| 2461022000 | 1007             | 2501012015 | 8870             | 2830001000 | 0000             | 2810003000 | 4659             |
| 2461850000 | CARB3103         | 2501060053 | 8870             | 2102001000 | 1185             | 2601000000 | 122              |
| 2415000000 | 8745             | 2501060201 | 8870             | 2102011000 | 0004             | 2601010000 | 122              |
| 2401015000 | 2405             | 2501080050 | 8869             | 2501060052 | 8870             | 2630010000 | 3003             |
| 2401020000 | 2405             | 2501080100 | 8869             | 2103004000 | 0002             | 2302070010 | 1188             |
| 2401025000 | 2406             | 2505030120 | 8870             | 2301010000 | 2462             | 2680002000 | 0000             |
| 2401055000 | 3149             | 2610000100 | 0121             | 2302000000 | 4553             | 2306010100 | 0026             |
| 2401075000 | 2414             | 2610000400 | 0121             | 2302050000 | 1188             | 2620010000 | 3002             |
| 2401080000 | 2415             | 2610000500 | 0121             | 2302070005 | 1188             | 2102010000 | 0004             |
| 2401070000 | 3131             | 2610030000 | 0121             | 2302080000 | 1188             | 2310010100 | 0003             |
| 2401030000 | 2552             | 2630020000 | 3003             | 2306010000 | 0026             | 2310010200 | 2487             |
| 2401040000 | 2408             | 2680003000 | 8933             | 2505010000 | 2489             | 2310011001 | 1011             |
| 2401060000 | 2411             | 2810025000 | 4553             | 2505020000 | 0305             | 2310011201 | 2487             |
| 2401065000 | 3138             | 2810060100 | 0000             | 2610000300 | 0121             | 2310011501 | 1011             |
| 2401085000 | 2416             | 2810060200 | 0000             | 2640000000 | 0000             | 2310011502 | 1011             |
| 2440000000 | 95512            | 2104004000 | 0002             | 2680001000 | 0000             | 2310011503 | 1011             |
| 2401005700 | 2402             | 2104011000 | 0002             | 2102005000 | 0001             | 2310011505 | 1011             |
| 2401010000 | 3137             | 2501050120 | 8869             | 2302002000 | 4553             | 2310021010 | 2487             |
| 2420000999 | 2422             | 2501055120 | 8869             | 2305000000 | 0000             | 2310021030 | 2487             |
| 2461023000 | 1007             | 2505040120 | 8869             | 2307000000 | 2405             | 2310021100 | 0003             |
| 2401050000 | 3127             | 2102002000 | 1185             | 2325030000 | 0000             | 2310021300 | 8949             |
| 2420000055 | 0085             | 2102006000 | 0003             | 2501995120 | 8762             | 2310021302 | 1001             |
| 2401045000 | 2409             | 2102008000 | 4642             | 2302070001 | 1188             | 2310021351 | 1001             |
| 2425010000 | 2543             | 2103004001 | 0002             | 2301020000 | 1092             | 2310021400 | 0003             |
| 2425020000 | 2544             | 2103004002 | 0002             | 2801520000 | 3161             | 2310021501 | 8949             |
| 2425030000 | 2545             | 2103007000 | 0003             | 2103005000 | 0001             | 2310021502 | 8949             |
| 2425040000 | 1086             | 2103008000 | 4642             | 2103001000 | 1178             | 2310021503 | 8949             |
| 2461020000 | 1007             | 2103011000 | 0002             | 2520010000 | 0000             | 2310021505 | 8949             |
| 2461800001 | CARB3103         | 2302010000 | 4553             | 2501080201 | 8762             | 2310021506 | 8949             |
| 2461800002 | CARB3103         | 2501060051 | 8870             | 2505020030 | 0305             | 2310021603 | 8949             |
| 2440020000 | 95507            | 2102004000 | 0002             | 2505020060 | 0305             | 2310023300 | 8950             |
| 2460000000 | 95512            | 2103006000 | 0003             | 2505020090 | 2488             | 2310023302 | 1001             |
| 2401035000 | 3137             | 2311030000 | 0000             | 2505020120 | 8869             | 2310023351 | 1001             |

|            |      |            |         |            |         |            |        |
|------------|------|------------|---------|------------|---------|------------|--------|
| 2461100000 | 0000 | 2325000000 | 0000    | 2505020150 | 100     | 2310023400 | 0003   |
| 2310023511 | 8950 | 2310000552 | 1207    | 2310421100 | 0003    | 2310421603 | 8949   |
| 2310023512 | 8950 | 2310023100 | 0003    | 2310011020 | 2487    | 2310421400 | 0003   |
| 2310023513 | 8950 | 2310023202 | 1001    | 2310021109 | 1001    | 2310020600 | 1001   |
| 2310023515 | 8950 | 2310023251 | 1001    | 2310021209 | 1001    | 2310011504 | 1011   |
| 2310023516 | 8950 | 2310023310 | 8950    | 2310021309 | 1001    | 2310011506 | 1011   |
| 2310000220 | 0008 | 2310023603 | 8950    | 2310021600 | SSJCO_R | 2310021103 | 1001   |
| 2310111100 | 1011 | 2310011500 | 95399   | 2310021602 | SSJCO_R | 2310021402 | 1001   |
| 2310111700 | 1011 | 2310020000 | 8949    | 2310000551 | 1207    | 2310021403 | 1001   |
| 2310000660 | 0008 | 2310022000 | 8949    | 2310023010 | 2487    | 2310021450 | 8949   |
| 2310023600 | 8950 | 2310010700 | DJVNT_R | 2310023030 | 2487    | 2310021504 | 8949   |
| 2310121700 | 8949 | 2310011450 | DJVNT_R | 2310021102 | 1001    | 2310021101 | 1001   |
| 2310001000 | 8949 | 2310021310 | DJVNT_R | 2310023606 | SSJCB_R | 2310021203 | 1001   |
| 2310010300 | 8949 | 2310021509 | DJVNT_R | 2310023509 | 8950    | 2310021301 | 1001   |
| 2310021251 | 1001 | 2310021700 | 1001    | 2310023102 | 1001    | 2310002000 | 8949   |
| 2310000553 | 1207 | 2310030220 | FLR99   | 2310021500 | FLR99   | 2310002421 | 8949   |
| 2310011600 | 1001 | 2310030300 | 1207    | 2310300220 | 0008    | 2310012000 | 1011   |
| 2310021202 | 1001 | 2310030400 | 2487    | 2310321010 | 2487    | 2310012020 | 95087a |
| 2310111401 | 1011 | 2310111701 | FLR99   | 2310321100 | 0003    | 2310012526 | 1011   |
| 2310121401 | 8949 | 2310321603 | DJVNT_R | 2310321400 | 0003    | 2310022105 | 0008   |
| 2310121100 | 8949 | 2310400220 | 0008    | 2310421010 | 2487    | 2310112401 | 1011   |
| 2310021303 | 1001 | 2310022010 | 95109a  | 2310021802 | 95417   | 2310011100 | 0003   |
| 2310022420 | 8949 | 2310022090 | 0003    | 2310021801 | 95417   | 2310000230 | 0008   |
| 2310002401 | 8949 | 2310022506 | 1010    | 2310021803 | FLR99   |            |        |

**Table S9: Tabulation of Fig. 4 from main text.**

| <b>Product Use Categories (PUCs)</b> | <b>2.5<sup>th</sup></b> | <b>25<sup>th</sup></b> | <b>Mean</b> | <b>75<sup>th</sup></b> | <b>97.5<sup>th</sup></b> |
|--------------------------------------|-------------------------|------------------------|-------------|------------------------|--------------------------|
| Cleaning Products                    | 1.25                    | 1.73                   | 2.03        | 2.31                   | 2.96                     |
| Personal Care Products               | 1.31                    | 1.76                   | 2.02        | 2.27                   | 2.80                     |
| Adhesives & Sealants                 | 0.50                    | 0.66                   | 0.76        | 0.85                   | 1.04                     |
| Paints & Coatings                    | 2.73                    | 3.13                   | 3.35        | 3.57                   | 4.03                     |
| Printing Inks                        | 0.53                    | 0.70                   | 0.80        | 0.89                   | 1.10                     |
| Pesticides & FIFRA Products          | 0.41                    | 0.52                   | 0.58        | 0.65                   | 0.79                     |
| Other                                | 0.02                    | 0.06                   | 0.16        | 0.24                   | 0.46                     |
| Total                                | 8.27                    | 9.23                   | 9.71        | 10.20                  | 11.23                    |

95

**Table S10: Mapping of all sub-PUCs to equivalent Source Classification Codes (SCCs).**

| PUC                         | SCC        | SCC Description                     | VCPy<br>sub-PUC                          |
|-----------------------------|------------|-------------------------------------|------------------------------------------|
|                             |            |                                     |                                          |
| Cleaning Products           | 2460200000 | All Household Products              | Detergents & Soaps<br>General Cleaners   |
|                             | 2415000000 | Degreasing                          |                                          |
|                             | 2460400000 | All Automotive Aftermarket Products |                                          |
| Personal Care Products      | 2460100000 | All Personal Care Products          | Daily Use Products<br>Short Use Products |
| Adhesives & Sealants        | 2460600000 | All Adhesives and Sealants          | Adhesives and Sealants                   |
| Paints & Coatings           | 2401001000 | Architectural Coatings              | Architectural Coatings                   |
|                             | 2460500000 | All Coatings and Related Products   | Aerosol Coatings                         |
|                             | 2401005000 | Auto Refinishing                    | Industrial Coatings                      |
|                             | 2401008000 | Traffic Markings                    |                                          |
|                             | 2401015000 | Factory Finished Wood               |                                          |
|                             | 2401020000 | Wood Furniture                      |                                          |
|                             | 2401025000 | Metal Furniture                     |                                          |
|                             | 2401030000 | Paper                               |                                          |
|                             | 2401040000 | Metal Cans                          |                                          |
|                             | 2401055000 | Machinery and Equipment             |                                          |
|                             | 2401060000 | Large Appliances                    |                                          |
|                             | 2401065000 | Electronic and Other Electrical     |                                          |
|                             | 2401070000 | Motor Vehicles                      |                                          |
|                             | 2401075000 | Aircraft                            |                                          |
|                             | 2401085000 | Railroad                            |                                          |
|                             | 2401080000 | Marine                              |                                          |
|                             | 2401090000 | Misc. Manufacturing                 |                                          |
|                             | 2401100000 | Industrial Maintenance Coatings     |                                          |
|                             | 2401200000 | Other Special Purpose Coatings      |                                          |
|                             | 2402000000 | Paint Strippers                     | Allied Paint Products                    |
| Printing Inks               | 2425000000 | Graphic Arts, employment            | Printing Inks                            |
| Pesticides & FIFRA Products | 2460800000 | All FIFRA Related Products          | FIFRA Pesticides                         |
|                             | 2461850000 | Pesticide Application: Agricultural | Agricultural Pesticides                  |
| Dry Cleaning                | 2420000000 | Dry Cleaning                        | Dry Cleaning                             |
| Oil & Gas                   | n/a        | n/a                                 | Oil & Gas                                |
| Misc. Products              | 2460900000 | Miscellaneous Products: NEC         | Misc. Products                           |
| Fuels and Lighter           | n/a        | n/a                                 | Fuels and Lighter                        |

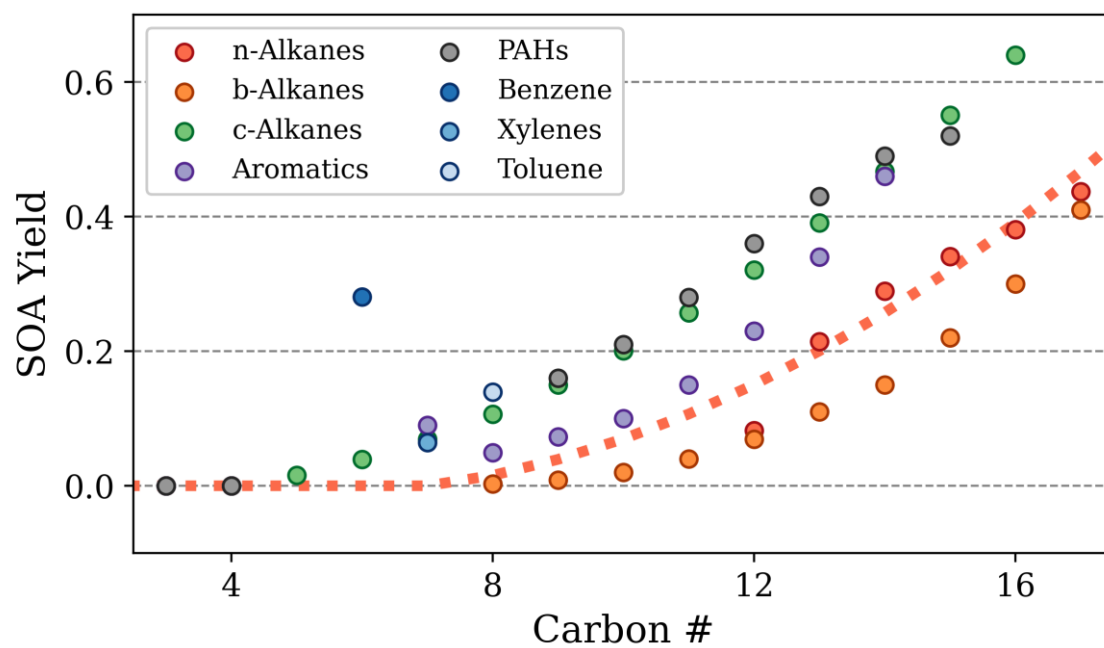

100 Figure S1: Summary of SOA yields by compound class. Several references are used to construct these values and are described in the main text.

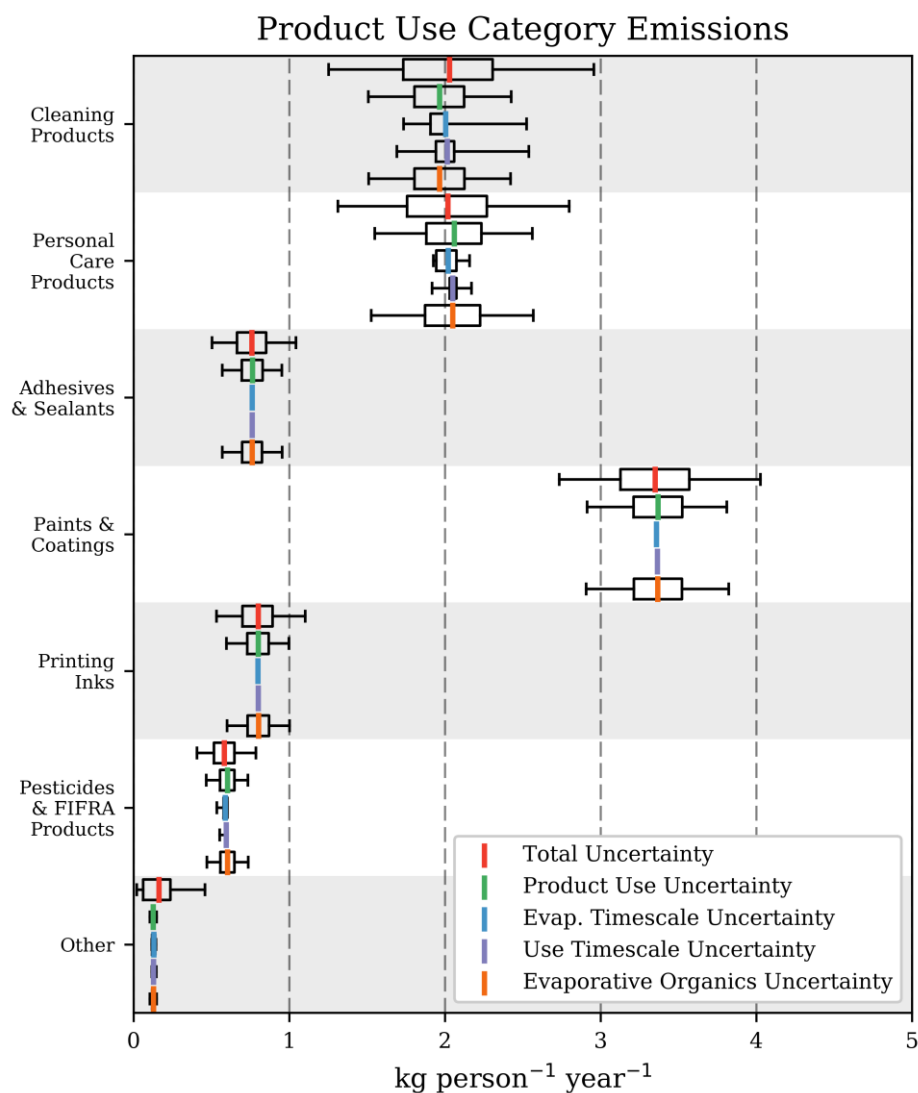

Figure S2: Monte Carlo sensitivity results: mean, interquartile range, and 95% confidence intervals for emission rates for six major PUCs and the sum of all others. Red: Estimate considering uncertainty in product usage, evaporation timescale, use timescale, and controls. Green: MC simulations that only perturb product usage uncertainties. Blue: MC simulations that only perturb evaporation timescale uncertainties. Purple: MC simulations that only perturb use timescale uncertainties. Orange: MC simulations that only perturb evaporative organic uncertainties.

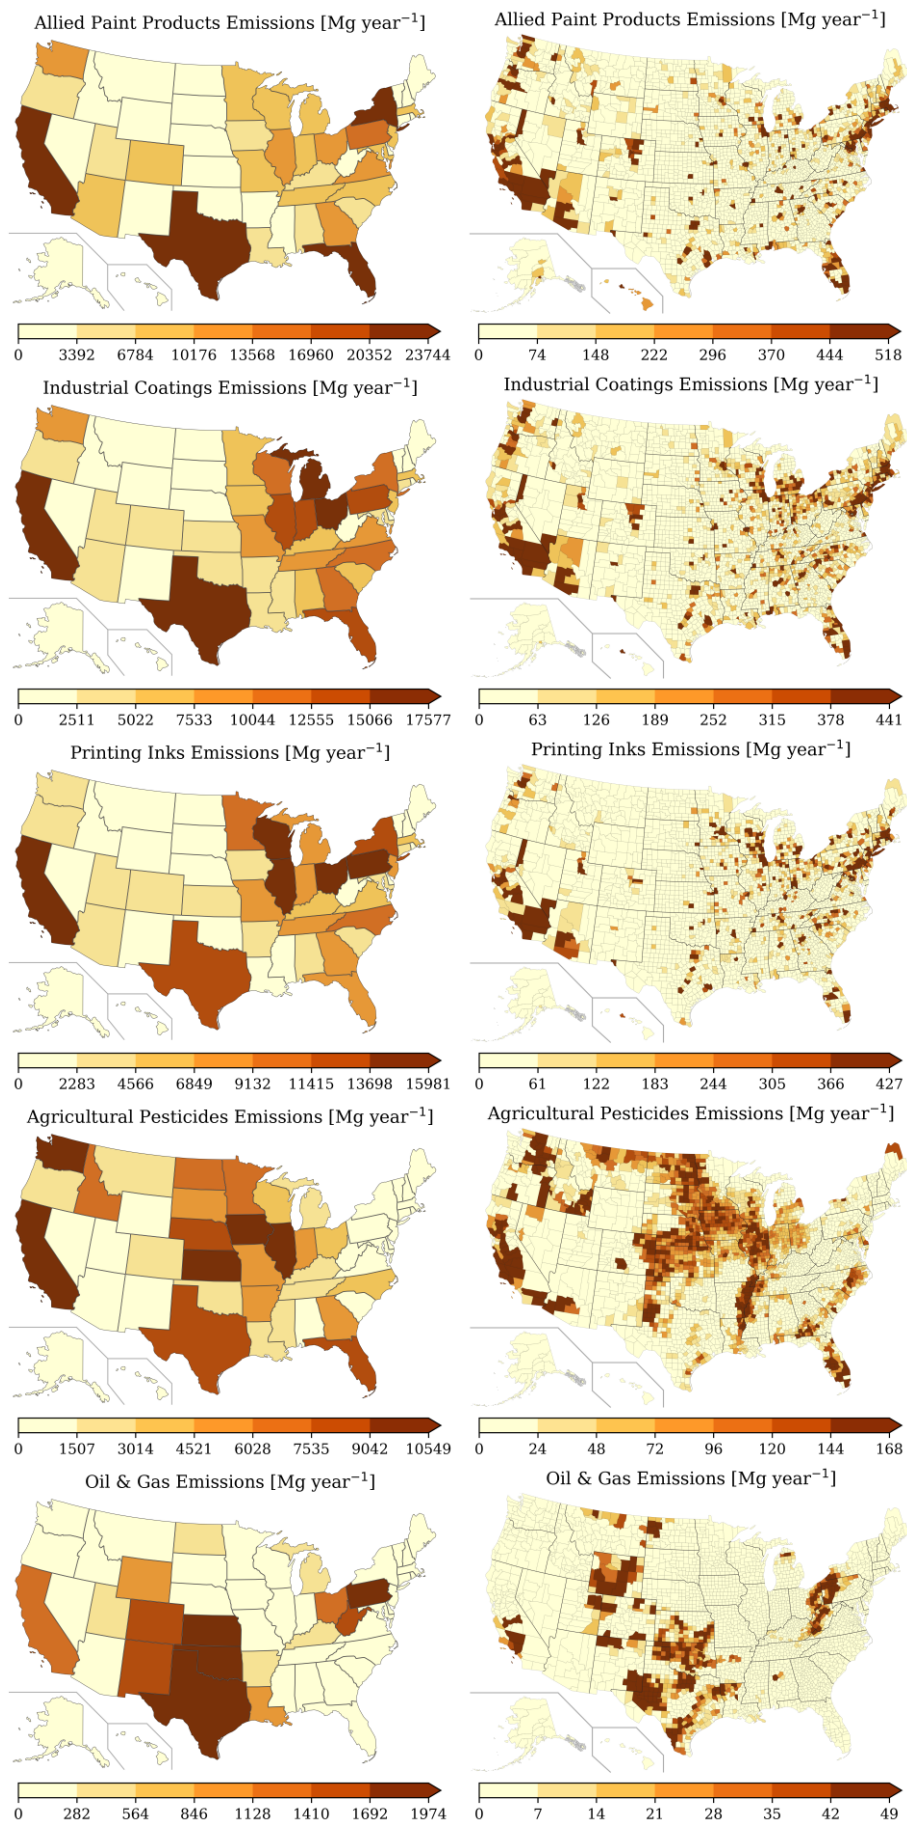

Figure S3: State and County-level emissions for select sub-PUCs.



115

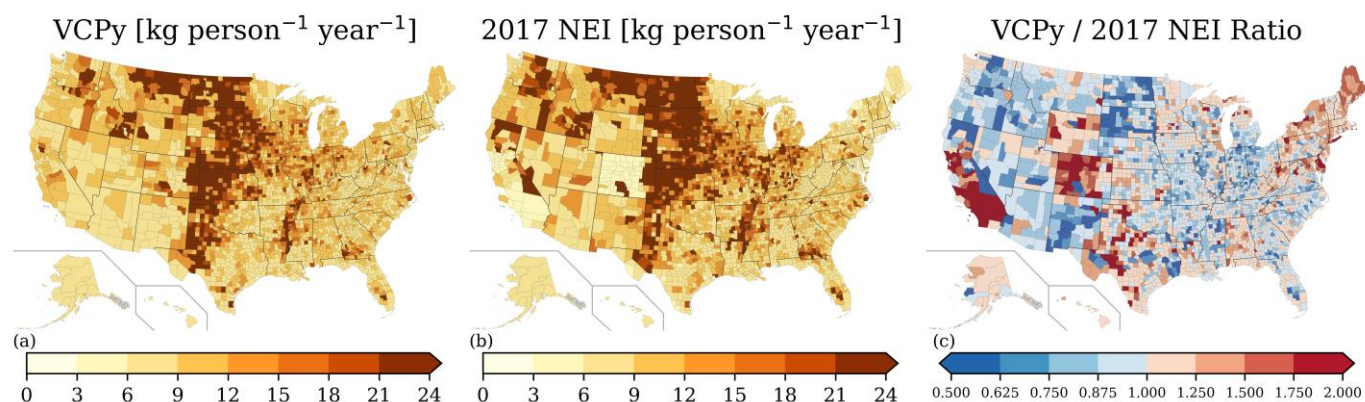

**Figure S4: (a) County-level per-capita VCP emissions from the VCPy inventory (same as right panel of Fig. 5 in main text), (b) County-level per-capita VCP emissions from the 2017 NEI, and (c) County-level ratio of VCPy / 2017 NEI VCP emissions.**

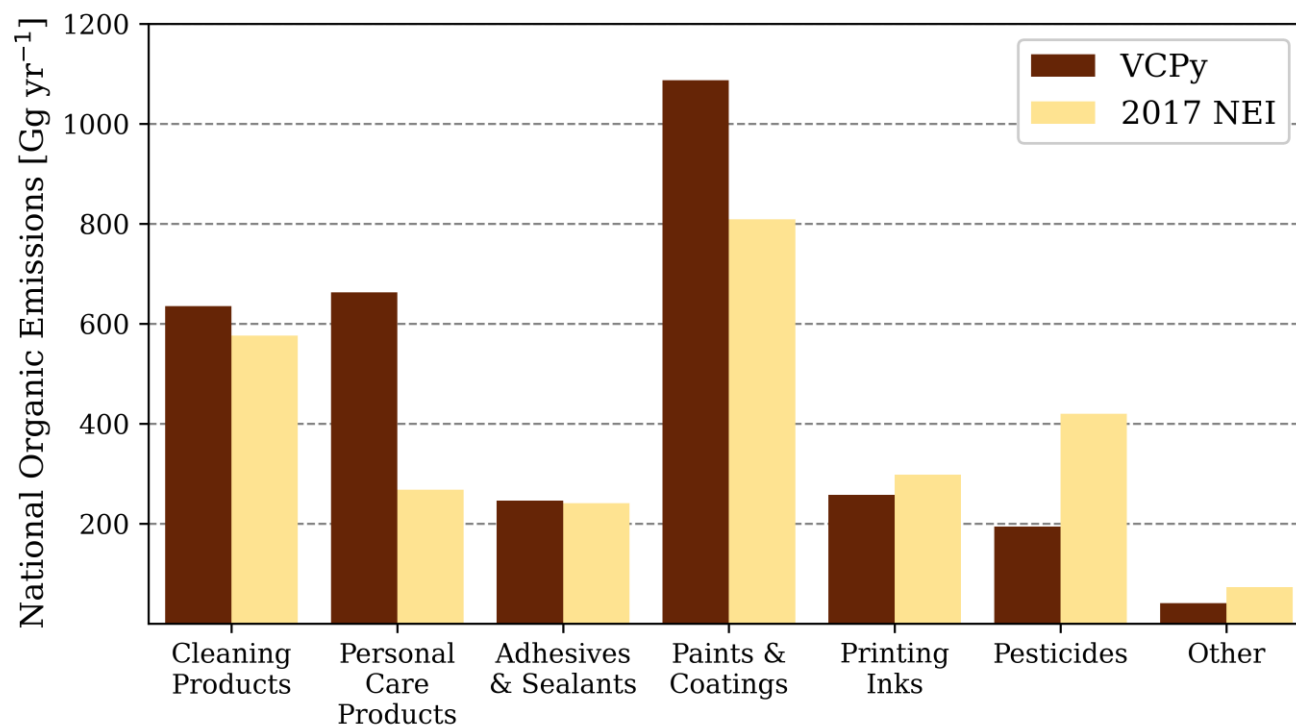

120 **Figure S5: Product Use Category comparison of national-level emissions from the VCPy and 2017 NEI inventories for VCPs. For “Other,” asphalt emissions in the 2017 NEI are excluded as those emissions are not quantified in the VCPy inventory.**

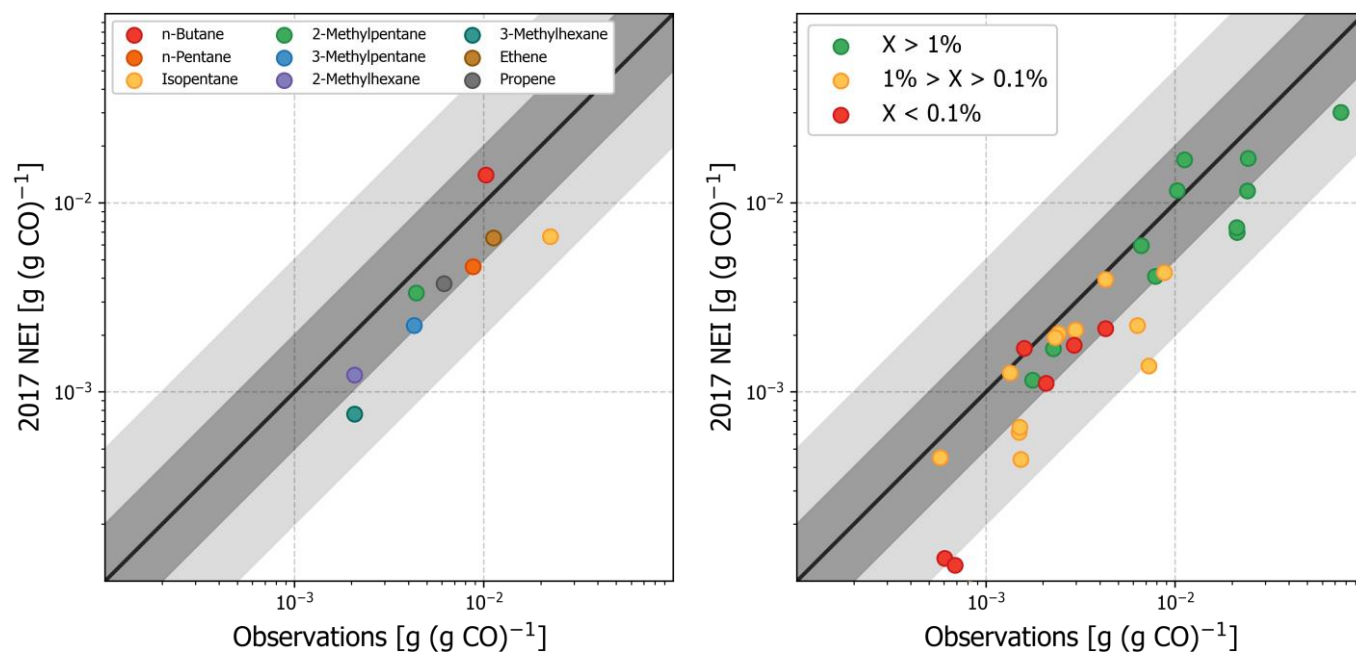

125 **Figure S6: (Left) Evaluation of organic emission ratios of species that feature high emission factors from mobile sources in Los Angeles County using observed emission ratios from summer 2010. (Right) Evaluation of 2017 NEI organic emission ratios in Los Angeles County using observed emission ratios from summer 2010. The scatter point colors represent the relative abundance of each compound in the complete VCP sector. For example, all green points represent compounds that are > 1% of the total VCP emissions in Los Angeles County. Black line – 1:1; Dark grey shading – 2:1; Light grey shading – 5:1.**

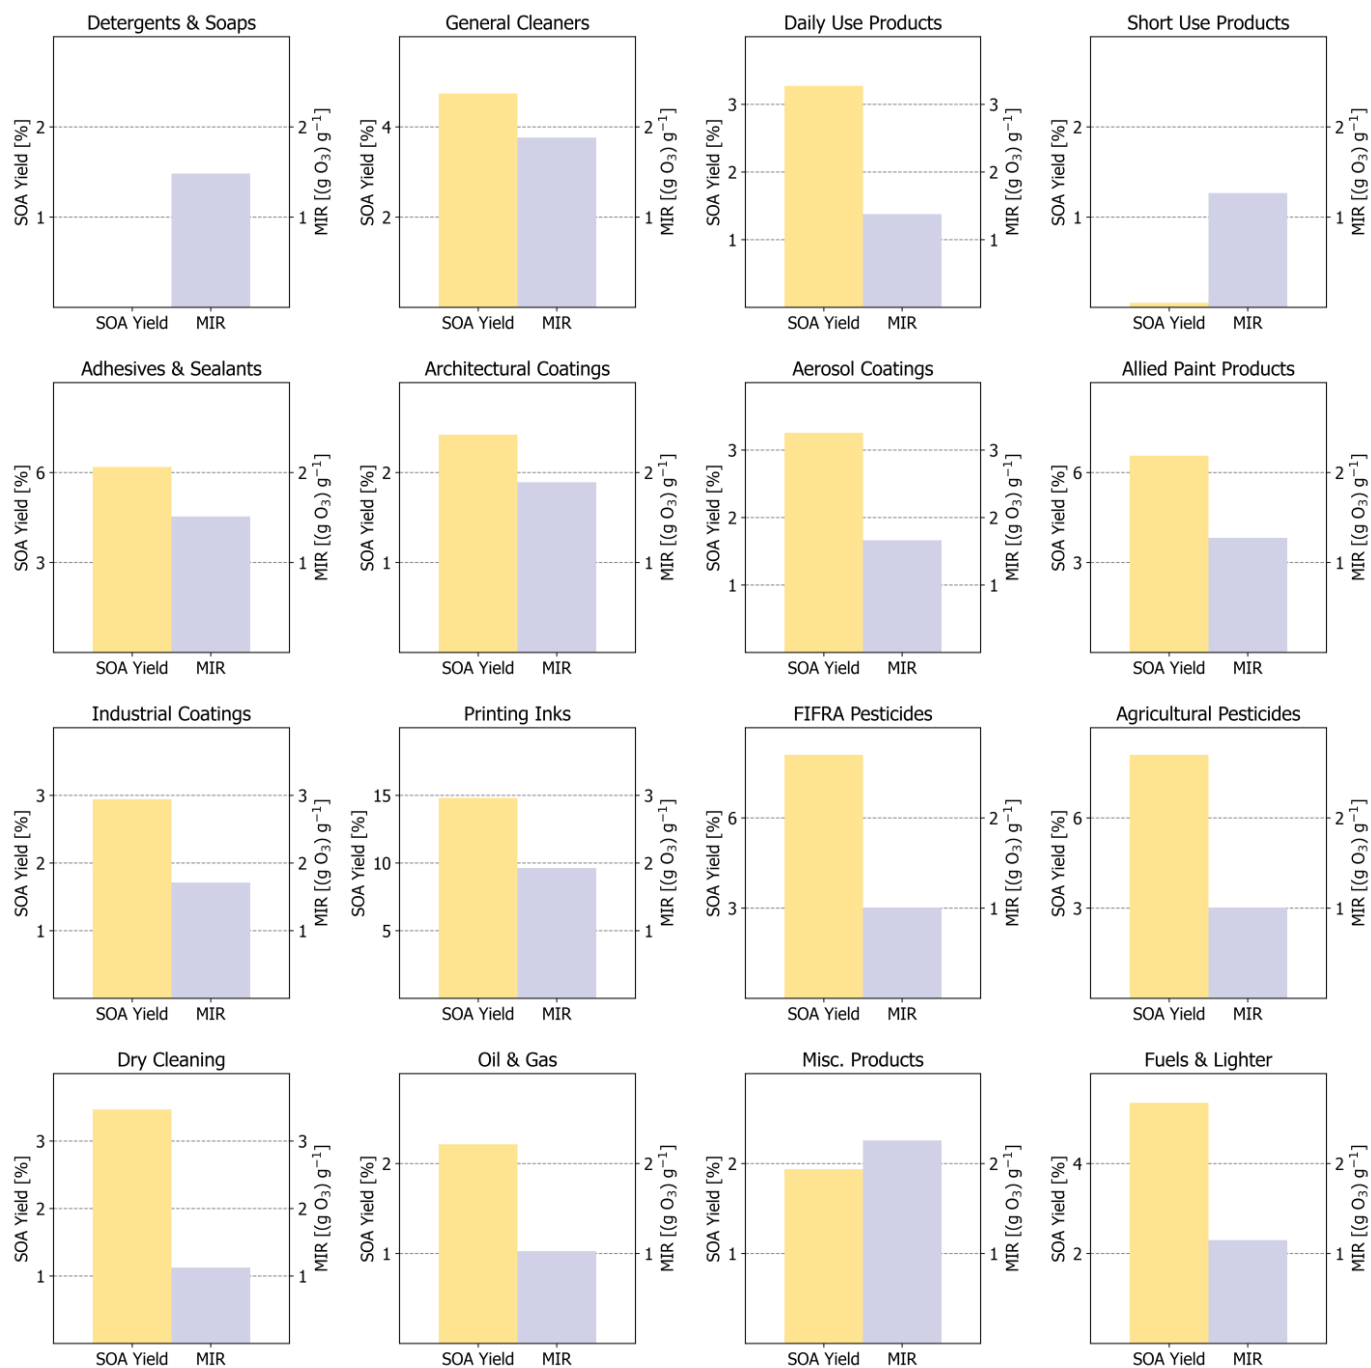

**Figure S7: Effective SOA yield and MIR for all sub-PUCs.**

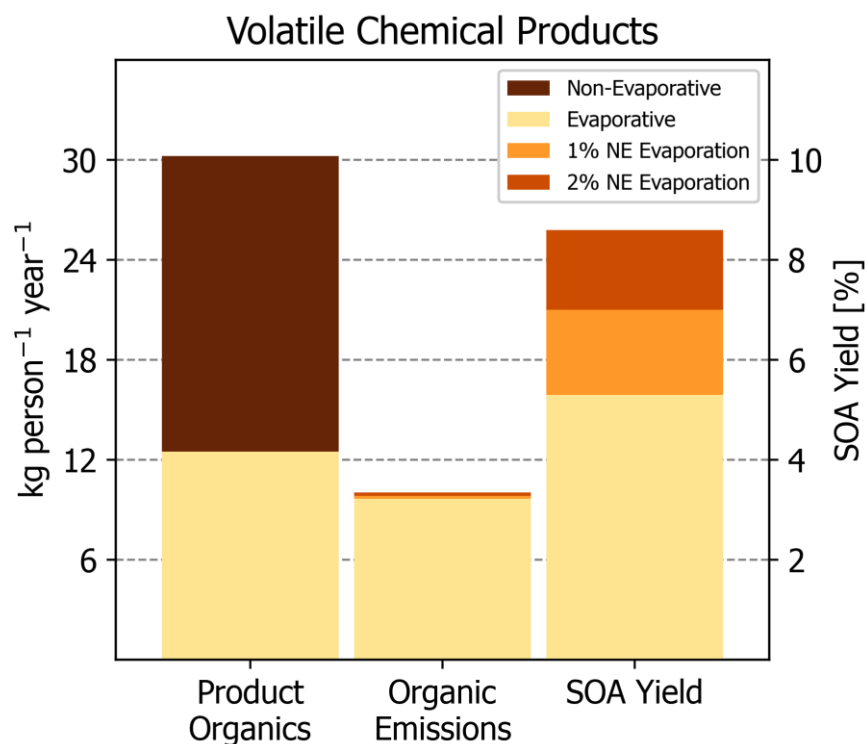

**Figure S8:** Total product organics, organic emissions, and sector-wide effective SOA yields resulting from adjusted non-evaporative assumptions. The two sensitivity tests are assuming 1% and 2% of all non-evaporative organic mass in VCPs evaporates and forms SOA with 100% efficiency.

140
